# Supplementary material for: WS2 nanosheets-sensitized CdS quantum dots heterostructure for photoelectrochemical immunoassay of alpha-fetoprotein coupled with enzyme-mediated biocatalytic precipitation
Source: Royal Society of Chemistry journal article supplement (doi:10.1039/c8an00551f), 2018-01-01
Supplement: c8an00551f1.pdf [file c8an00551f1.pdf]

## **Electronic Supplementary Information (ESI)**

### **WS<sub>2</sub> nanosheets sensitized CdS quantum dots heterostructure for photoelectrochemical immunoassay of alpha-fetoprotein coupled with enzyme-mediated biocatalytic precipitation**

Yang Zang, Yun Ju, Xin Hu, Hui Zhou, Zhanjun Yang, Jingjing Jiang\*, Huaiguo Xue\*

School of Chemistry and Chemical Engineering, Yangzhou University, Yangzhou, Jiangsu, 225002, P. R. China

\*Corresponding author. Tel.: +86-514-87975436 / Fax: +86-514-87975244.

E-mail address: jjj@yzu.edu.cn (J. Jiang), chhgxue@yzu.edu.cn (H. Xue).

## **Experimental section**

### **Apparatus**

Scanning electron micrograph (SEM) was characterized using S-4800 field emission scanning electron microscopy (Hitachi, Japan). Transmission electron micrographs (TEM) were performed by a Tecnai 12 microscope (Philips, Netherlands). UV-vis absorption spectra were obtained by a UV-2501PC fluorescence spectrometer (Shimadzu Co. Kyoto, Japan). X-ray photoelectron spectroscopy (XPS) measurements were carried out on an ESCALAB 250Xi spectrometer (Thermo Fisher, USA) with an Al K $\alpha$  radiation source. Dynamic light scattering (DLS) spectrum was obtained via Nano-ZS90 light scattering instrument (Malvern, Britain). Raman spectra were performed by a DXRxi Micro Raman imaging spectrometer (Thermo Fisher, USA). Photoelectrochemical measurements were

performed via a home-built PEC system with white light as an accessory excitation source. Intensity-modulated photovoltage spectroscopy (IMVS) measurements were detected on a Zahner intensity modulated photospectrometer (Zahner, German) with a white light as the excitation source. Incident-photon-to-current conversion efficiency (IPCE) data were measured in the wavelength range from 300 to 800 nm (Newport 94063, Stratford, CT, USA). Current-voltage (I-V) experiments were recorded by a CHI 660E electrochemical workstation (CH Instruments Inc., USA). Electrochemical impedance spectroscopy (EIS) was tested using a PGSTAT30/FRA2 system (Autolab, The Netherlands). All experiments were carried out at room temperature using a conventional three-electrode system: a modified ITO electrode (4 mm in diameter) as the working, a platinum electrode as the auxiliary, and an Ag/AgCl as the reference electrodes.

### **Preparation of CdS QDs**

CdS QDs was synthesized as follows.<sup>S1</sup> 250  $\mu$ L of TGA was dropped into 100 mL three-necked flask containing 50 mL of CdCl<sub>2</sub> solution (0.01 M), and was subsequently stirred and purged nitrogen for 30 min. The pH of the above solution could be adjusted with 1.0 M NaOH up to about 11 during this interval. After the injection of 5.0 mL of Na<sub>2</sub>S solution (0.1 M), the resulting mixture was refluxed for 4 h at 110 °C under nitrogen atmosphere. Finally, the obtained QDs were diluted by ultrapure water, treated by centrifugal precipitation to remove the impurities with the aid of isopropanol, and redissolved by the equivalent amount of deionized water.

## Preparation of WS<sub>2</sub> NTs

Exfoliated WS<sub>2</sub> NTs were prepared via mixed-solvent strategy according to the previous work.<sup>S2</sup> Briefly, 300 mg of WS<sub>2</sub> powder was dispersed into 100 mL ethanol-water solution (the volume fraction of water was 65%), and then sonicated for 16 h. The generated dispersion was centrifuged for 20 min twice at 3000 rpm to remove the unexfoliated bulk WS<sub>2</sub>. The resulting supernatant was further collected via a vacuum-rotary evaporation procedure at 70 °C. After being dissolved, the aqueous solution of WS<sub>2</sub> NTs was obtained and stored at 4 °C for next experiments.

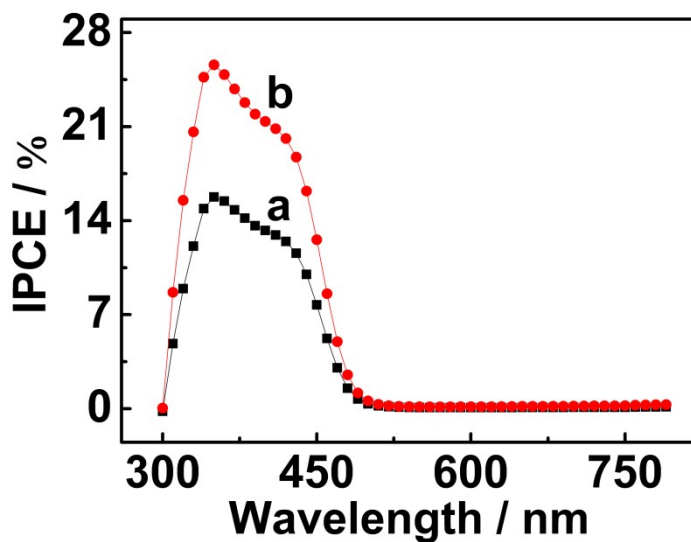

**Fig. S1** IPCE spectra of CdS (a), WS<sub>2</sub>/CdS (b) modified ITO electrodes in 0.1 M Tris-HCl of pH 7.4 containing 0.1 M AA.

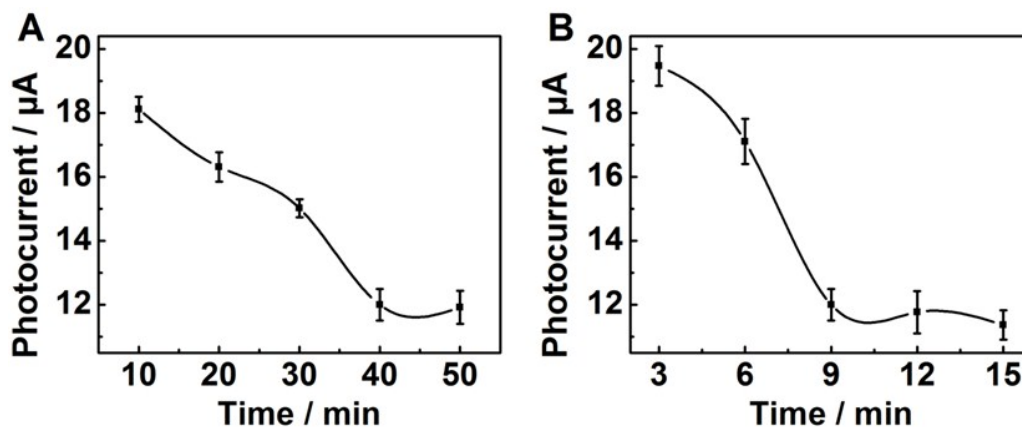

**Fig. S2** Effects of (A) incubation time between  $Ab_1$  and AFP, and (B) biocatalytic precipitation time of HRP- $Ab_2$  on photocurrent responses of prepared immunosensor. The AFP concentration was 5 ng mL<sup>-1</sup>.

**Table S1** Comparison of the analytical performances of various immunosensing methods toward target AFP.

| Detection methods        | Linear range (ng mL <sup>-1</sup> ) | Detection limit (ng mL <sup>-1</sup> ) | References |
|--------------------------|-------------------------------------|----------------------------------------|------------|
| Electrochemistry         | $1 \times 10^{-5} - 1$              | $3.7 \times 10^{-6}$                   | S3         |
| Electrochemistry         | $5 \times 10^{-3} - 50$             | $1.6 \times 10^{-3}$                   | S4         |
| Electrochemiluminescence | $1 \times 10^{-4} - 30$             | $3 \times 10^{-5}$                     | S5         |
| Electrochemiluminescence | $1 \times 10^{-2} - 100$            | $3.3 \times 10^{-3}$                   | S6         |
| Fluorescence             | $9.8 \times 10^{-2} - 15$           | $9.5 \times 10^{-2}$                   | S7         |
| Fluorescence             | $1 - 80$                            | 0.45                                   | S8         |
| Photoelectrochemistry    | $5 \times 10^{-2} - 100$            | $4 \times 10^{-2}$                     | S9         |
| Photoelectrochemistry    | $1 \times 10^{-3} - 1000$           | $3.1 \times 10^{-4}$                   | S10        |
| Photoelectrochemistry    | $1 \times 10^{-3} - 20$             | $4.3 \times 10^{-4}$                   | This work  |

**Table S2** Detection results of clinical serum samples using proposed and reference methods.

| Sample | Proposed method (ng mL <sup>-1</sup> ) | Reference method (ng mL <sup>-1</sup> ) | Relative error (%) |
|--------|----------------------------------------|-----------------------------------------|--------------------|
| 1      | 11.19                                  | 10.58                                   | +5.8               |
| 2      | 3.85                                   | 3.67                                    | +4.9               |
| 3      | 1.67                                   | 1.72                                    | -2.9               |
| 4      | 0.72                                   | 0.67                                    | +7.5               |

## References

- S1 Y. Zang, J. P. Lei, Q. Hao and H. X. Ju, *ACS Appl. Mater. Interfaces*, 2014, **6**, 15991–15997.
- S2 K. G. Zhou, N. N. Mao, H. X. Wang, Y. Peng and H. L. Zhang, *Angew. Chem. Int. Ed.*, 2011, **50**, 10839–10842.
- S3 S. Liu, Y. H. Ma, M. Cui and X. L. Luo, *Sens. Actuators B: Chem.*, 2018, **255**, 2568–2574.
- S4 H. Y. Jia, T. T. Yang, Y. X. Zuo, W. M. Wang, J. K. Xu, L. M. Lu and P. Li, *Microchim. Acta*, 2017, **184**, 3747–3753.
- S5 X. Q. Zhu, Q. F. Zhai, W. L. Gu, J. Li and E. K. Wang, *Anal. Chem.*, 2017, **89**, 12108–12114.
- S6 J. Zhou, T. Q. Han, H. M. Ma, T. Yan, X. H. Pang, Y. Y. Li and Q. Wei, *Anal. Chim. Acta*, 2015, **889**, 82–89.

- S7 Y. H. Ma, L. P. Zhang, L. Wang, L. Wang and H. Q. Chen, *Anal. Methods*, 2017, **9**, 2977–2982.
- S8 Y. W. Wang, L. Y. Chen, M. F. Liang, H. Xu, S. R. Tang, H. H. Yang and H. B. Song, *Sens. Actuators B: Chem.*, 2017, **247**, 408–413.
- S9 X. Chen, W. Xu, Y. D. Jiang, G. C. Pan, D. L. Zhou, J. Y. Zhu, H. Wang, C. Chen, D. Y. Li and H. W. Song, *Nanoscale*, 2017, **9**, 16357–16364.
- S10 J. X. Chen and G. C. Zhao, *Biosens. Bioelectron.*, 2017, **98**, 155–160.
